# Supplementary material for: Magnetic field actuated manipulation and transfer of oil droplets on a stable underwater superoleophobic surface
Source: Royal Society of Chemistry journal article supplement (doi:10.1039/c6cp01419d), 2016-01-01
Supplement: c6cp01419d1.pdf [file c6cp01419d1.pdf]

## Magnetic field actuated manipulation and transfer of oil droplets on a stable underwater superoleophobic surface

Haifeng Feng,<sup>a,b</sup> Xun Xu,<sup>a,b</sup> Weichang Hao,<sup>b,c</sup> Yi Du,<sup>\*a,b</sup> Dongliang Tian<sup>\*a,b,d</sup> and Lei Jiang<sup>b,d,e</sup>

<sup>a</sup> Institute for Superconducting and Electronic Materials (ISEM), Australian Institute for Innovative Materials (AIIM), University of Wollongong, Wollongong, NSW 2500, Australia

<sup>b</sup> UOW-BUAA Joint Research Centre, Beihang University, Beijing 100191, P. R. China

<sup>c</sup> Department of Physics and Key Laboratory of Micro-nano Measurement, Manipulation and Physics, Ministry of Education (MOE), Beihang University, Beijing 100191, P. R. China

<sup>d</sup> Key Laboratory of Bio-Inspired Smart Interfacial Science and Technology of Ministry of Education, School of Chemistry and Environment, Beihang University, Beijing 100191, PR China

<sup>e</sup> Laboratory of Bioinspired Smart Interfacial Science, Technical Institute of Physics and Chemistry, Chinese Academy of Sciences, Beijing, 100190, P. R. China

\* To whom correspondence should be addressed. Email: [yi\\_du@uow.edu.au](mailto:yi_du@uow.edu.au); [tiandl@buaa.edu.cn](mailto:tiandl@buaa.edu.cn)

### Supplementary information

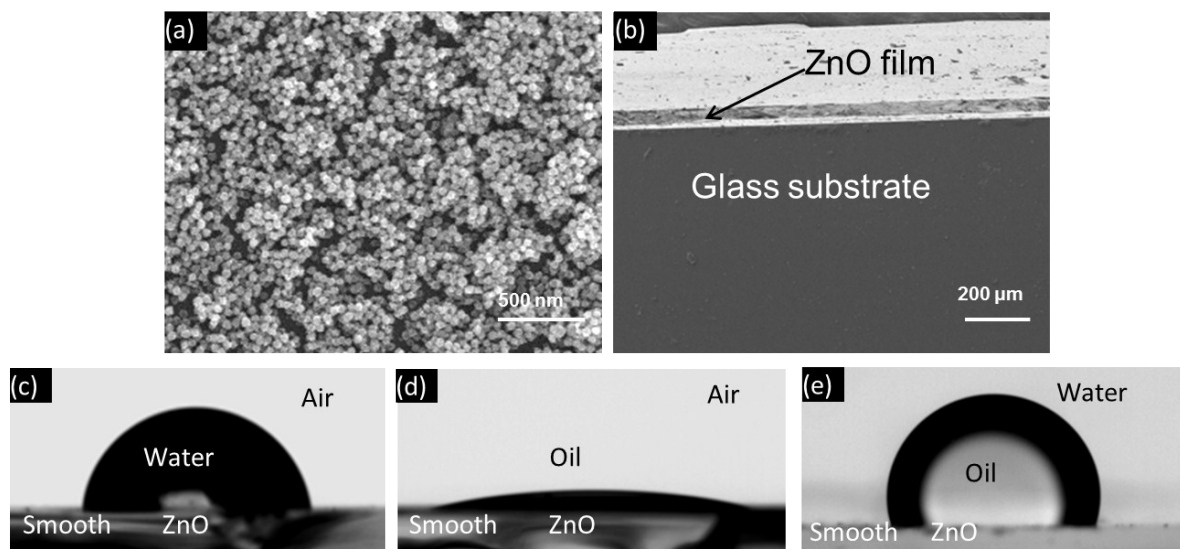

**Figure S1** Morphology and wettability characterization of an as-prepared smooth ZnO surface. SEM images of the smooth ZnO surface: (a) Top view; (b) Side view. Photographs of water (c) and oil (d) droplets on the smooth ZnO surface in air, respectively. (e) Photograph of an oil droplet on the aligned nanorod arrays surface in water.
